# Supplementary material for: Novel oestrogen receptor β-selective ligand reduces obesity and depressive-like behaviour in ovariectomized mice
Source: PubMed Central journal article supplement (PMC5498485; doi:10.1038/s41598-017-04946-5), 2017-07-05
Supplement: 41598_2017_4946_MOESM1_ESM.pdf [file 41598_2017_4946_MOESM1_ESM.pdf]

**Supplementary information**

**Novel oestrogen receptor  $\beta$ -selective ligand reduces obesity and depressive-like behaviour in ovariectomized mice**

Daimei Sasayama<sup>1</sup>, Nobuhiro Sugiyama<sup>1,2\*</sup>, Shigeru Yonekubo<sup>3</sup>, Akiko Pawlak<sup>4</sup>,  
Hiroyasu Murasawa<sup>4</sup>, Mie Nakamura<sup>4</sup>, Morimichi Hayashi<sup>5</sup>, Takashi Ogawa<sup>5</sup>,  
Makoto Moro<sup>6</sup>, Shinsuke Washizuka<sup>1</sup>, Naoji Amano<sup>7</sup>, Kazuhiro Hongo<sup>7</sup>,  
Hideki Ohnota<sup>7</sup>

<sup>1</sup> Department of Psychiatry, Shinshu University School of Medicine, Matsumoto, Nagano, 390-8621, JAPAN

<sup>2</sup> Department of Applied Occupational Therapy, Shinshu University School of Health Sciences, Matsumoto, Nagano, 390-8621, JAPAN

<sup>3</sup> Discovery Research I, R&D, Kissei Pharmaceutical Co., Ltd., 4365-1 Kashiwabara, Hotaka, Azumino, Nagano, 399-8304, JAPAN

<sup>4</sup> Nihon Bioresearch Inc. 6-104, Majima, Fukuju-cho, Hashima, Gifu, 501-6251, JAPAN

<sup>5</sup> Safety Research Laboratory, R&D, Kissei Pharmaceutical Co., Ltd., 2320-1 Maki, Azumino, Nagano, 399-8304, JAPAN

<sup>6</sup> Biologics Research, R&D, Kissei Pharmaceutical Co., Ltd., 4365-1 Kashiwabara, Hotaka, Azumino, Nagano, 399-8304, JAPAN

<sup>7</sup> Department of Drug Discovery Science, Shinshu University School of Medicine, Matsumoto, Nagano, 390-8621, JAPAN

*\*Corresponding author and person to whom reprint requests should be addressed:*

Professor Nobuhiro Sugiyama, MD, PhD

Supplementary Table S1: Immobility time in the forced swim test.

| Group                         | Animal           | Immobility time (s) |         |         |         |         |         |                 |                 |                 |
|-------------------------------|------------------|---------------------|---------|---------|---------|---------|---------|-----------------|-----------------|-----------------|
|                               |                  | 0-1 min             | 1-2 min | 2-3 min | 3-4 min | 4-5 min | 5-6 min | Total (0-6 min) | Total (0-3 min) | Total (3-6 min) |
| Sham-operated mice            | Sham-op mouse 1  | 0.63                | 14.22   | 42.33   | 31.44   | 37.87   | 48.82   | 175.31          | 57.18           | 118.13          |
|                               | Sham-op mouse 2  | 2.24                | 8.75    | 6.49    | 15.05   | 16.41   | 9.31    | 58.25           | 17.48           | 40.77           |
|                               | Sham-op mouse 3  | 0.00                | 41.83   | 17.45   | 17.62   | 20.48   | 38.22   | 135.60          | 59.28           | 76.32           |
|                               | Sham-op mouse 4  | 2.99                | 3.30    | 7.87    | 42.96   | 26.09   | 30.57   | 113.78          | 14.16           | 99.62           |
|                               | Sham-op mouse 5  | 5.14                | 11.08   | 20.68   | 26.88   | 17.58   | 22.14   | 103.50          | 36.90           | 66.60           |
|                               | Sham-op mouse 6  | 0.00                | 9.71    | 14.63   | 12.37   | 26.51   | 27.41   | 90.63           | 24.34           | 66.29           |
|                               | Sham-op mouse 7  | 0.01                | 1.32    | 2.29    | 2.82    | 0.00    | 8.98    | 15.42           | 3.62            | 11.80           |
|                               | Sham-op mouse 8  | 2.37                | 3.32    | 19.26   | 22.97   | 21.66   | 20.61   | 90.19           | 24.95           | 65.24           |
|                               | Sham-op mouse 9  | 1.97                | 6.19    | 31.28   | 20.49   | 19.19   | 18.96   | 98.08           | 39.44           | 58.64           |
|                               | Sham-op mouse 10 | 0.00                | 23.27   | 25.41   | 45.42   | 34.68   | 36.50   | 165.28          | 48.68           | 116.60          |
|                               | Sham-op mouse 11 | 7.88                | 11.29   | 9.59    | 9.51    | 7.84    | 11.45   | 57.56           | 28.76           | 28.80           |
|                               | Sham-op mouse 12 | 10.17               | 30.18   | 52.28   | 58.96   | 58.93   | 48.69   | 259.21          | 92.63           | 166.58          |
| OVX placebo-administered mice | OVX mouse 1      | 10.60               | 24.74   | 31.40   | 26.70   | 33.95   | 40.19   | 167.58          | 66.74           | 100.84          |
|                               | OVX mouse 2      | 5.30                | 20.61   | 31.64   | 39.18   | 39.37   | 28.04   | 164.14          | 57.55           | 106.59          |
|                               | OVX mouse 3      | 44.50               | 37.74   | 34.42   | 36.83   | 49.41   | 33.92   | 236.82          | 116.66          | 120.16          |
|                               | OVX mouse 4      | 43.64               | 43.85   | 52.10   | 50.04   | 39.02   | 40.24   | 268.89          | 139.59          | 129.30          |
|                               | OVX mouse 5      | 7.07                | 29.76   | 34.59   | 1.40    | 28.54   | 32.18   | 133.54          | 71.42           | 62.12           |
|                               | OVX mouse 6      | 12.58               | 26.36   | 45.89   | 37.11   | 20.84   | 35.72   | 178.50          | 84.83           | 93.67           |
|                               | OVX mouse 7      | 30.61               | 22.70   | 30.96   | 24.33   | 35.97   | 38.69   | 183.26          | 84.27           | 98.99           |
|                               | OVX mouse 8      | 23.67               | 19.10   | 14.40   | 21.58   | 11.87   | 25.13   | 115.75          | 57.17           | 58.58           |
|                               | OVX mouse 9      | 19.16               | 8.94    | 15.44   | 5.78    | 18.37   | 22.48   | 90.17           | 43.54           | 46.63           |
|                               | OVX mouse 10     | 0.00                | 1.85    | 20.34   | 20.76   | 27.00   | 50.15   | 120.10          | 22.19           | 97.91           |
|                               | OVX mouse 11     | 22.07               | 24.17   | 35.47   | 47.81   | 49.94   | 51.15   | 230.61          | 81.71           | 148.90          |
|                               | OVX mouse 12     | 23.12               | 41.60   | 49.79   | 51.80   | 48.12   | 51.02   | 265.45          | 114.51          | 150.94          |
| OVX C-1-administered mice     | OVX+C-1 mouse 1  | 2.44                | 4.76    | 2.23    | 2.46    | 2.67    | 15.43   | 29.99           | 9.43            | 20.56           |
|                               | OVX+C-1 mouse 2  | 4.32                | 5.40    | 1.69    | 7.31    | 5.15    | 7.99    | 31.86           | 11.41           | 20.45           |
|                               | OVX+C-1 mouse 3  | 5.98                | 7.18    | 10.80   | 22.01   | 16.14   | 33.50   | 95.61           | 23.96           | 71.65           |
|                               | OVX+C-1 mouse 4  | 5.30                | 14.16   | 25.90   | 32.60   | 28.71   | 35.53   | 142.20          | 45.36           | 96.84           |
|                               | OVX+C-1 mouse 5  | 12.62               | 16.82   | 22.78   | 19.22   | 34.28   | 28.90   | 134.62          | 52.22           | 82.40           |
|                               | OVX+C-1 mouse 6  | 2.20                | 2.45    | 18.33   | 14.18   | 3.28    | 17.04   | 57.48           | 22.98           | 34.50           |
|                               | OVX+C-1 mouse 7  | 4.93                | 41.71   | 44.75   | 53.90   | 49.83   | 54.44   | 249.56          | 91.39           | 158.17          |
|                               | OVX+C-1 mouse 8  | 2.92                | 4.95    | 7.51    | 28.46   | 27.51   | 40.38   | 111.73          | 15.38           | 96.35           |
|                               | OVX+C-1 mouse 9  | 16.64               | 46.23   | 49.83   | 51.56   | 58.62   | 46.43   | 269.31          | 112.70          | 156.61          |
|                               | OVX+C-1 mouse 10 | 0.88                | 5.89    | 10.99   | 7.29    | 33.45   | 49.11   | 107.61          | 17.76           | 89.85           |
|                               | OVX+C-1 mouse 11 | 11.55               | 41.15   | 55.51   | 50.19   | 59.48   | 23.98   | 241.86          | 108.21          | 133.65          |
|                               | OVX+C-1 mouse 12 | 3.58                | 27.99   | 29.87   | 26.48   | 45.49   | 38.94   | 172.35          | 61.44           | 110.91          |
| OVX E2-administered mice      | OVX+E2 mouse 1   | 0.00                | 4.63    | 10.14   | 8.17    | 14.85   | 10.97   | 48.76           | 14.77           | 33.99           |
|                               | OVX+E2 mouse 2   | 3.09                | 4.37    | 2.26    | 30.91   | 19.64   | 20.38   | 80.65           | 9.72            | 70.93           |
|                               | OVX+E2 mouse 3   | 8.01                | 16.51   | 19.87   | 20.78   | 18.45   | 22.92   | 106.54          | 44.39           | 62.15           |
|                               | OVX+E2 mouse 4   | 5.45                | 27.08   | 31.35   | 29.09   | 25.13   | 28.48   | 146.58          | 63.88           | 82.70           |
|                               | OVX+E2 mouse 5   | 0.51                | 5.33    | 8.70    | 11.44   | 20.52   | 20.36   | 66.86           | 14.54           | 52.32           |
|                               | OVX+E2 mouse 6   | 3.57                | 21.29   | 23.28   | 49.90   | 43.58   | 27.98   | 169.60          | 48.14           | 121.46          |
|                               | OVX+E2 mouse 7   | 3.93                | 12.57   | 26.99   | 49.60   | 47.92   | 45.17   | 186.18          | 43.49           | 142.69          |
|                               | OVX+E2 mouse 8   | 3.41                | 3.58    | 5.22    | 13.30   | 8.59    | 11.93   | 46.03           | 12.21           | 33.82           |
|                               | OVX+E2 mouse 9   | 1.59                | 24.38   | 26.98   | 16.50   | 17.65   | 8.21    | 95.31           | 52.95           | 42.36           |
|                               | OVX+E2 mouse 10  | 12.68               | 17.12   | 16.13   | 19.96   | 39.21   | 49.56   | 154.66          | 45.93           | 108.73          |
|                               | OVX+E2 mouse 11  | 1.25                | 12.47   | 8.53    | 12.62   | 15.95   | 13.51   | 64.33           | 22.25           | 42.08           |
|                               | OVX+E2 mouse 12  | 16.06               | 37.28   | 34.68   | 30.39   | 26.04   | 53.56   | 198.01          | 88.02           | 109.99          |
